# Supplementary material
Source: publisher figshare collection journal article supplement (https://acs.figshare.com/ndownloader/files/4862818)
Supplement: Supplementary file 1 [file 4862818]

## Supporting information

# Marine-Derived Secondary Metabolite, Griseusrazin A Suppresses Inflammation Through Heme Oxygenase-1 Induction in Activated RAW264.7 Macrophages

Dong-Sung Lee,<sup>†,‡,⊥</sup> Chi-Su Yoon,<sup>†,⊥</sup> Yong-Taek Jung,<sup>§</sup> Jung-Hoon Yoon,<sup>§</sup> Youn-Chul Kim,<sup>†</sup> and Hyuncheol Oh<sup>\*,†</sup>

<sup>†</sup>College of Pharmacy, Wonkwang University, Iksan, 54538, Republic of Korea

<sup>‡</sup>Department of Biomedical Chemistry, College of Health and Biomedical Science, Konkuk University, Chung-Ju 27478, Republic of Korea

<sup>§</sup>Department of Food Science and Biotechnology, Sungkyunkwan University, Jangan-gu, Suwon 16419, Republic of Korea

### Corresponding Author

\*E-mail: hoh@wonkwang.ac.kr. Fax: +82-63-852-8837. Tel: +82-63-850-6815 (H. Oh)

### Author Contributions

<sup>⊥</sup>D.-S. Lee and C.-S. Yoon contributed equally to this work.

## List of supporting information

### Contents

**Figure S1.** HRESITOF mass spectrum of compound **1**

**Figure S2.**  $^1\text{H}$  NMR spectrum (400 MHz, acetone- $d_6$ ) of compound **1**

**Figure S3.**  $^{13}\text{C}$  NMR spectrum (100 MHz, acetone- $d_6$ ) of compound **1**

**Figure S4.** HSQC spectrum of compound **1**

**Figure S5.** HMBC spectrum of compound **1**

**Figure S6.**  $^{15}\text{NH}$ -HMBC spectrum of compound **1**

**Figure S7.** IR spectrum of compound **1**

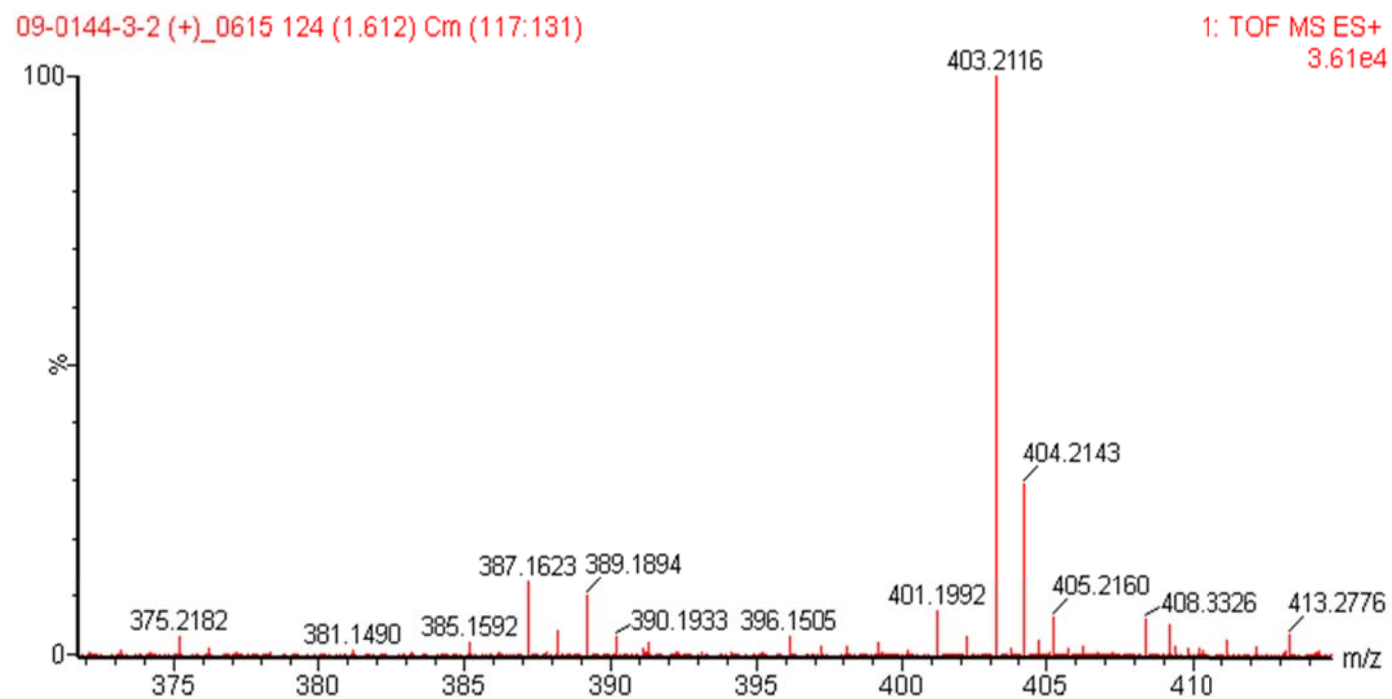

**Figure S1.** HRESITOF mass spectrum of **1**

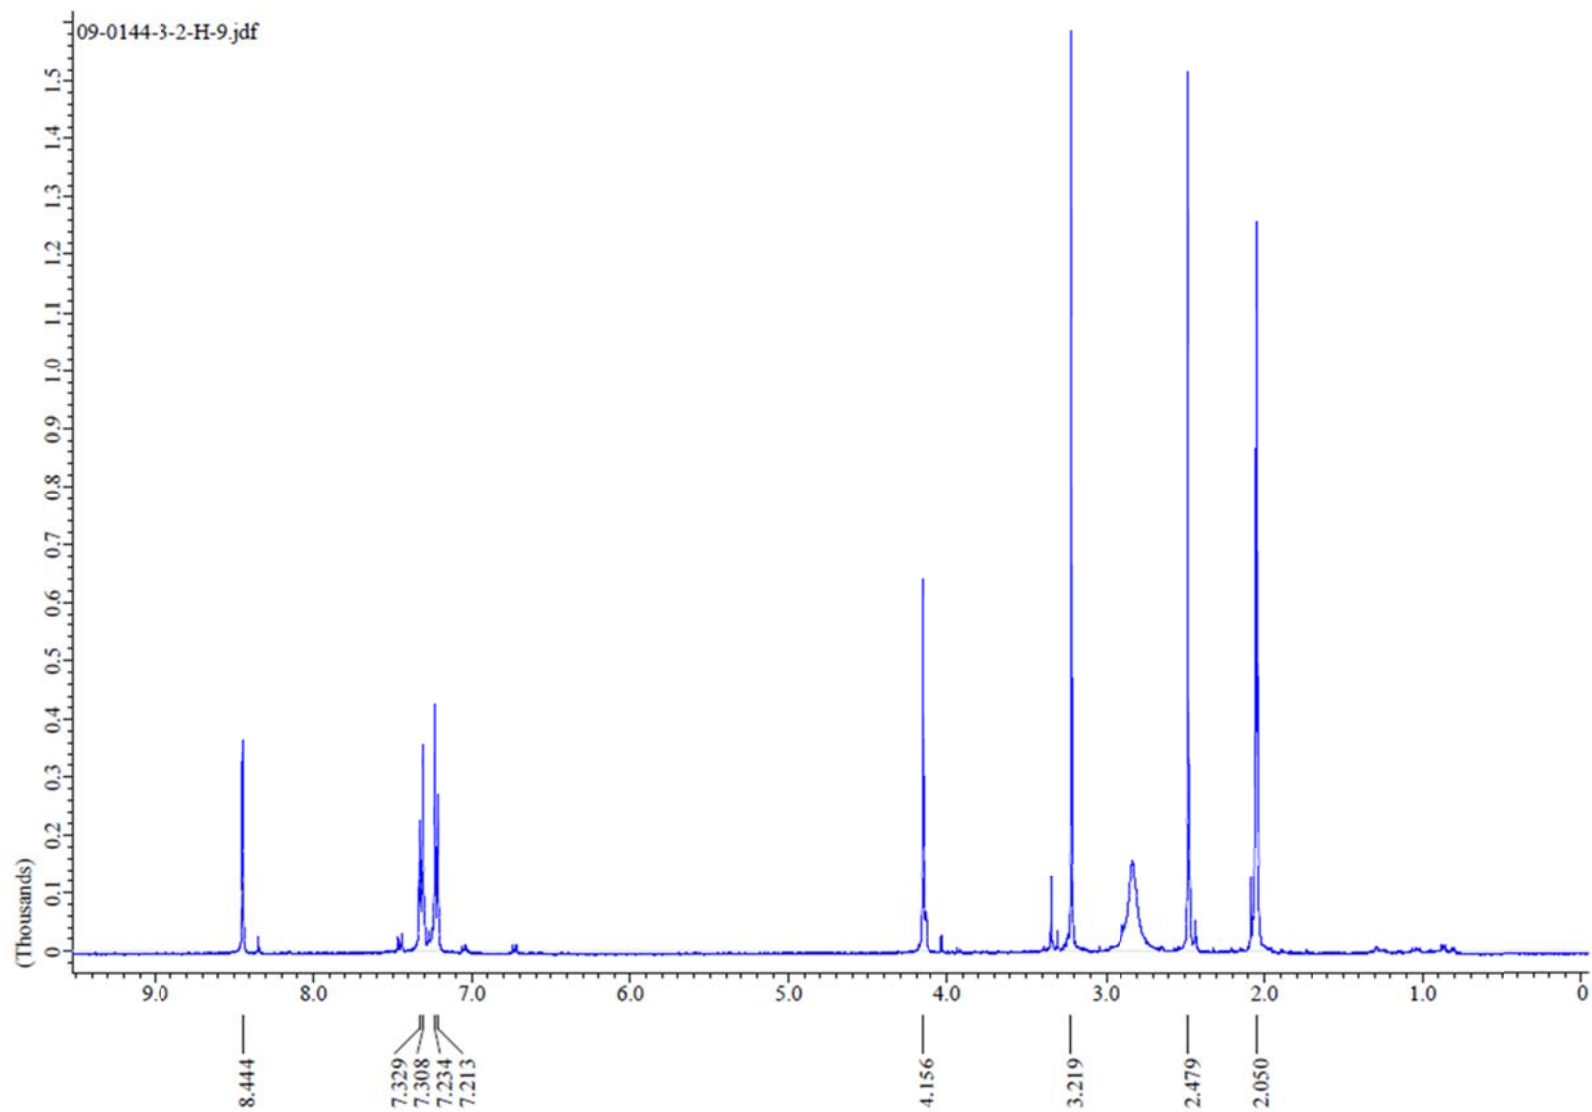

**Figure S2.**  $^1\text{H}$  NMR spectrum (400 MHz, acetone- $d_6$ ) of compound **1**

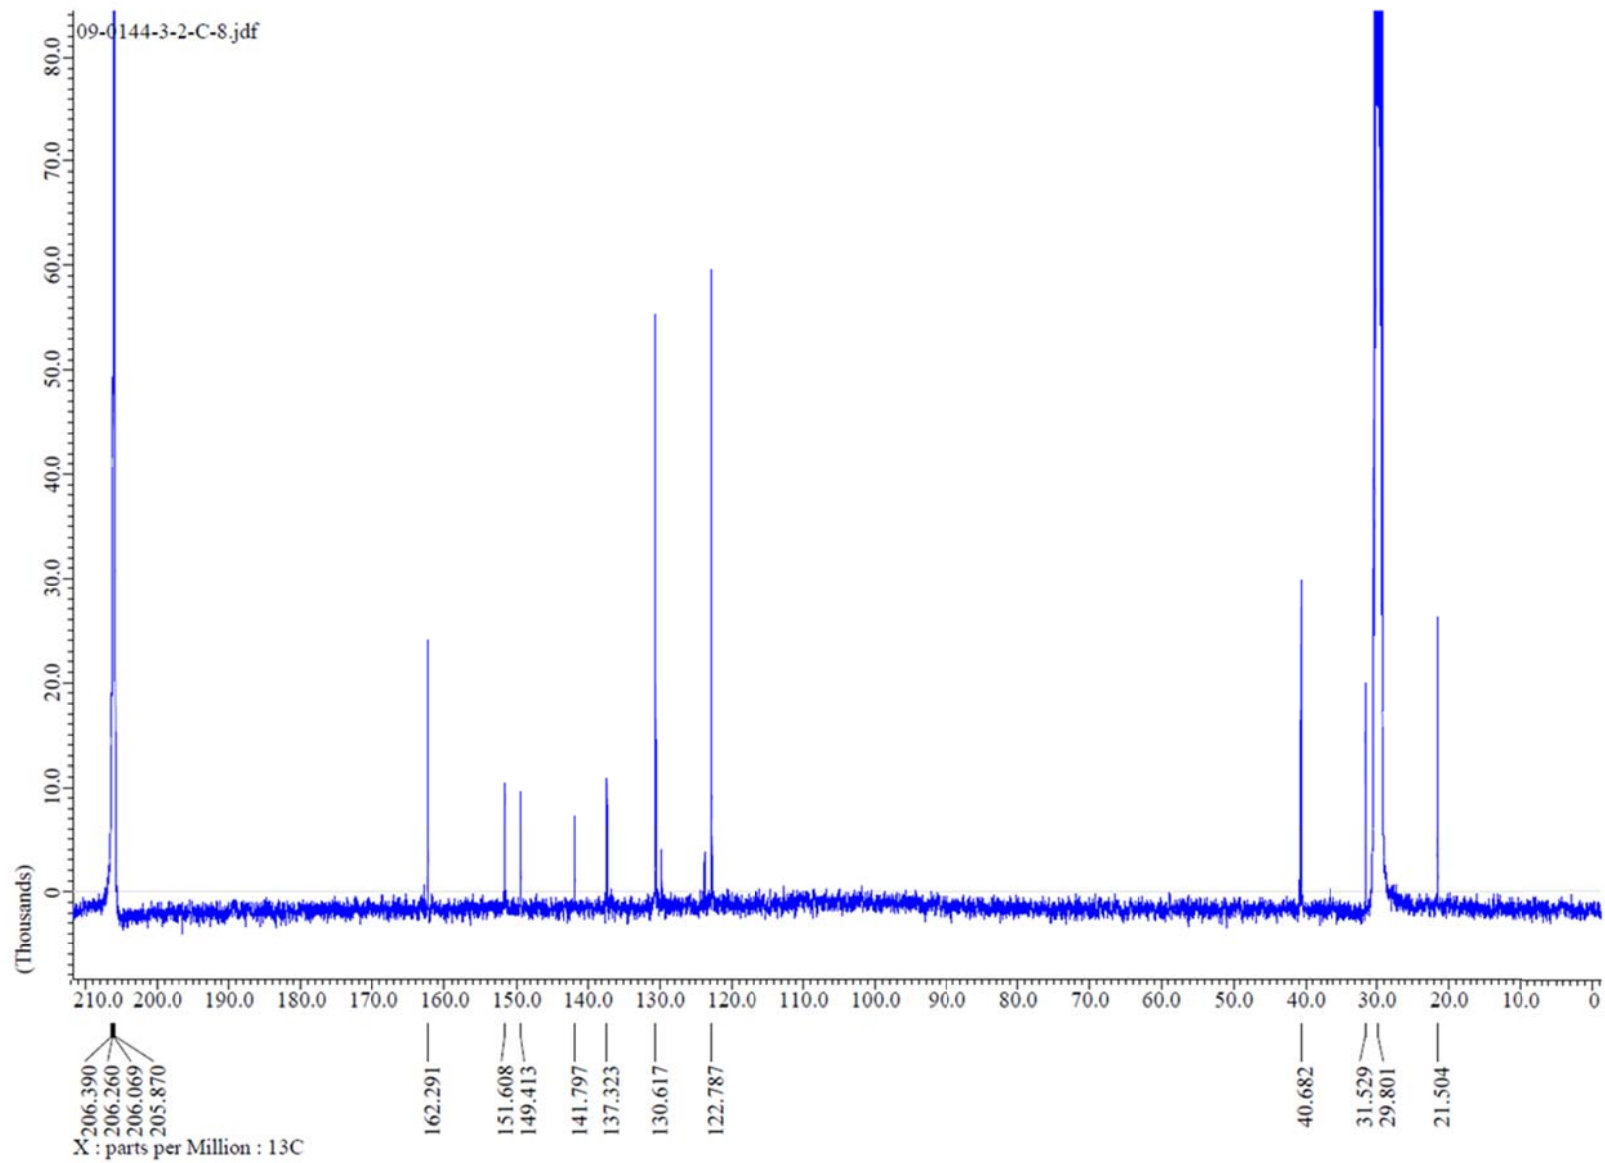

**Figure S3.**  $^{13}\text{C}$  NMR spectrum (100 MHz, acetone- $d_6$ ) of compound **1**

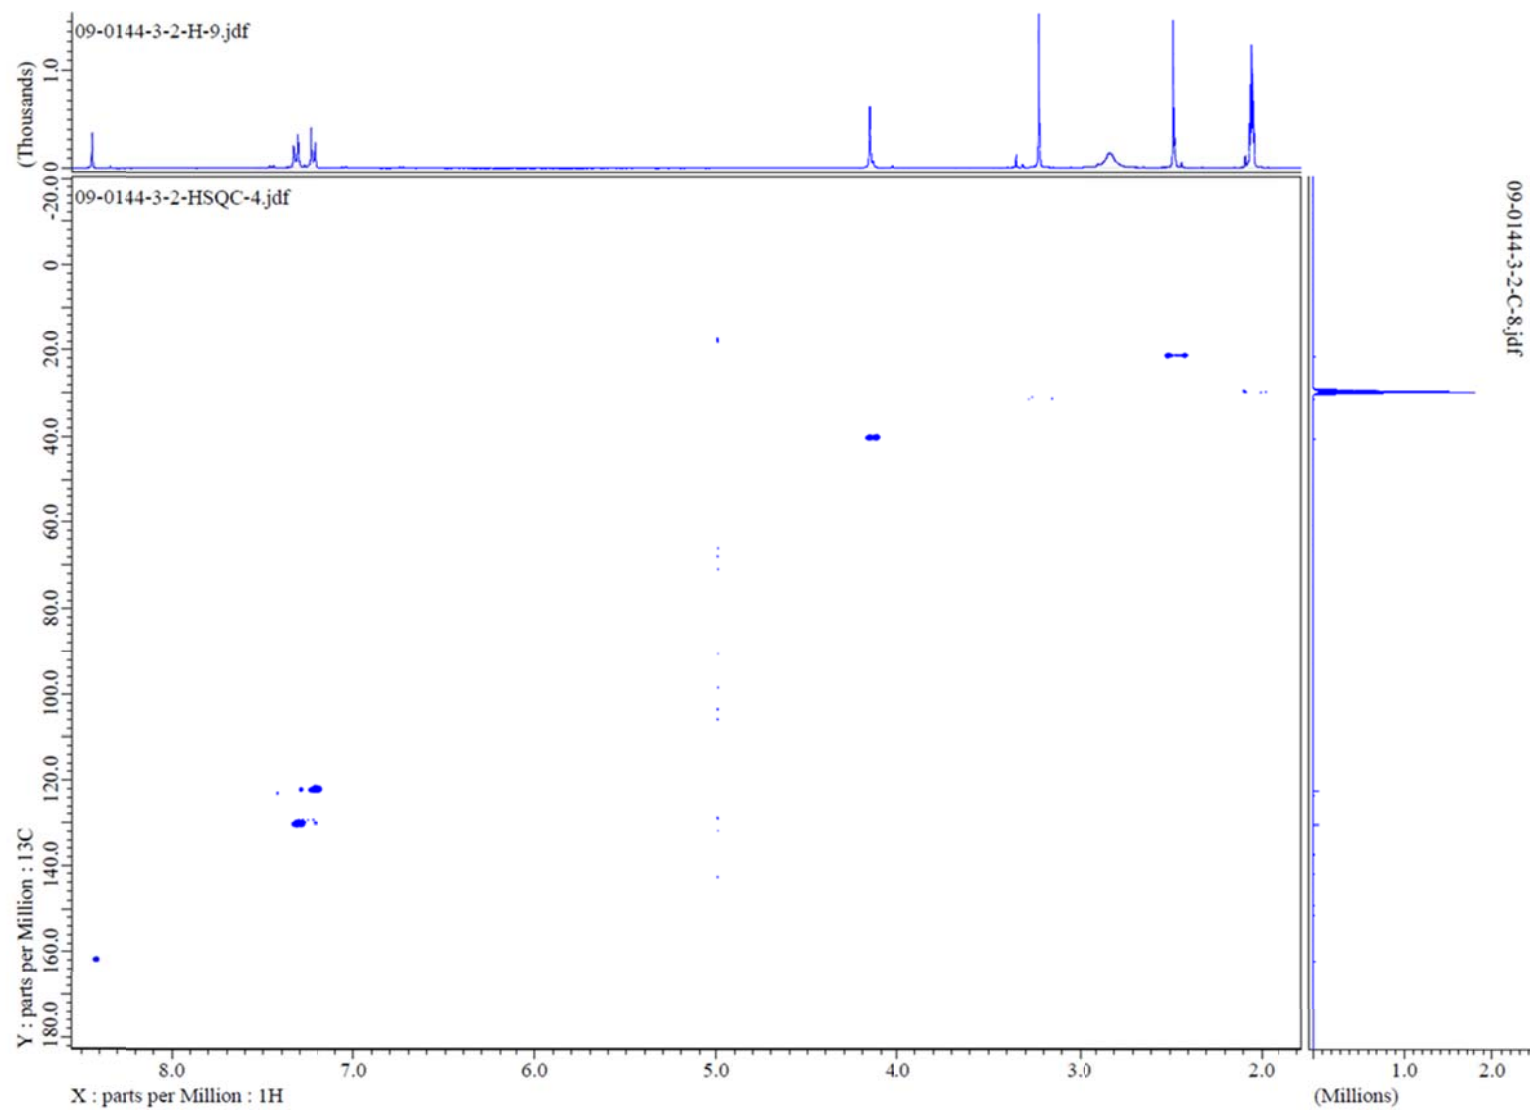

**Figure S4.** HSQC spectrum of compound **1**

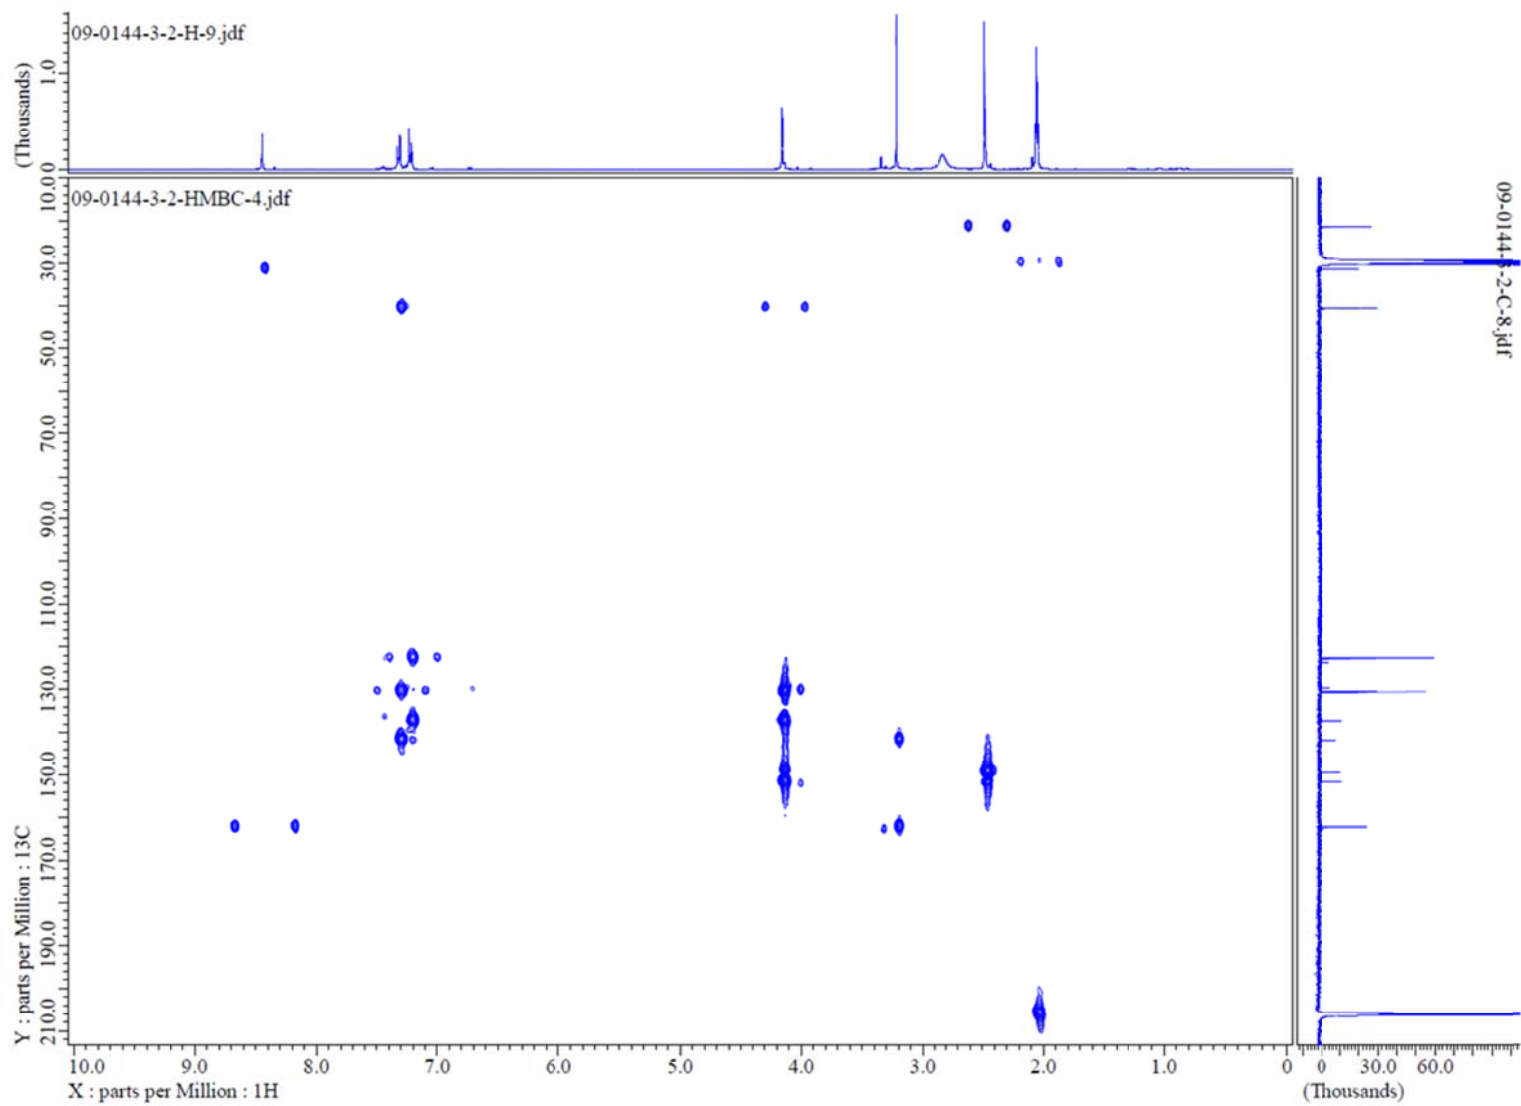

**Figure S5.** HMBC spectrum of compound **1**

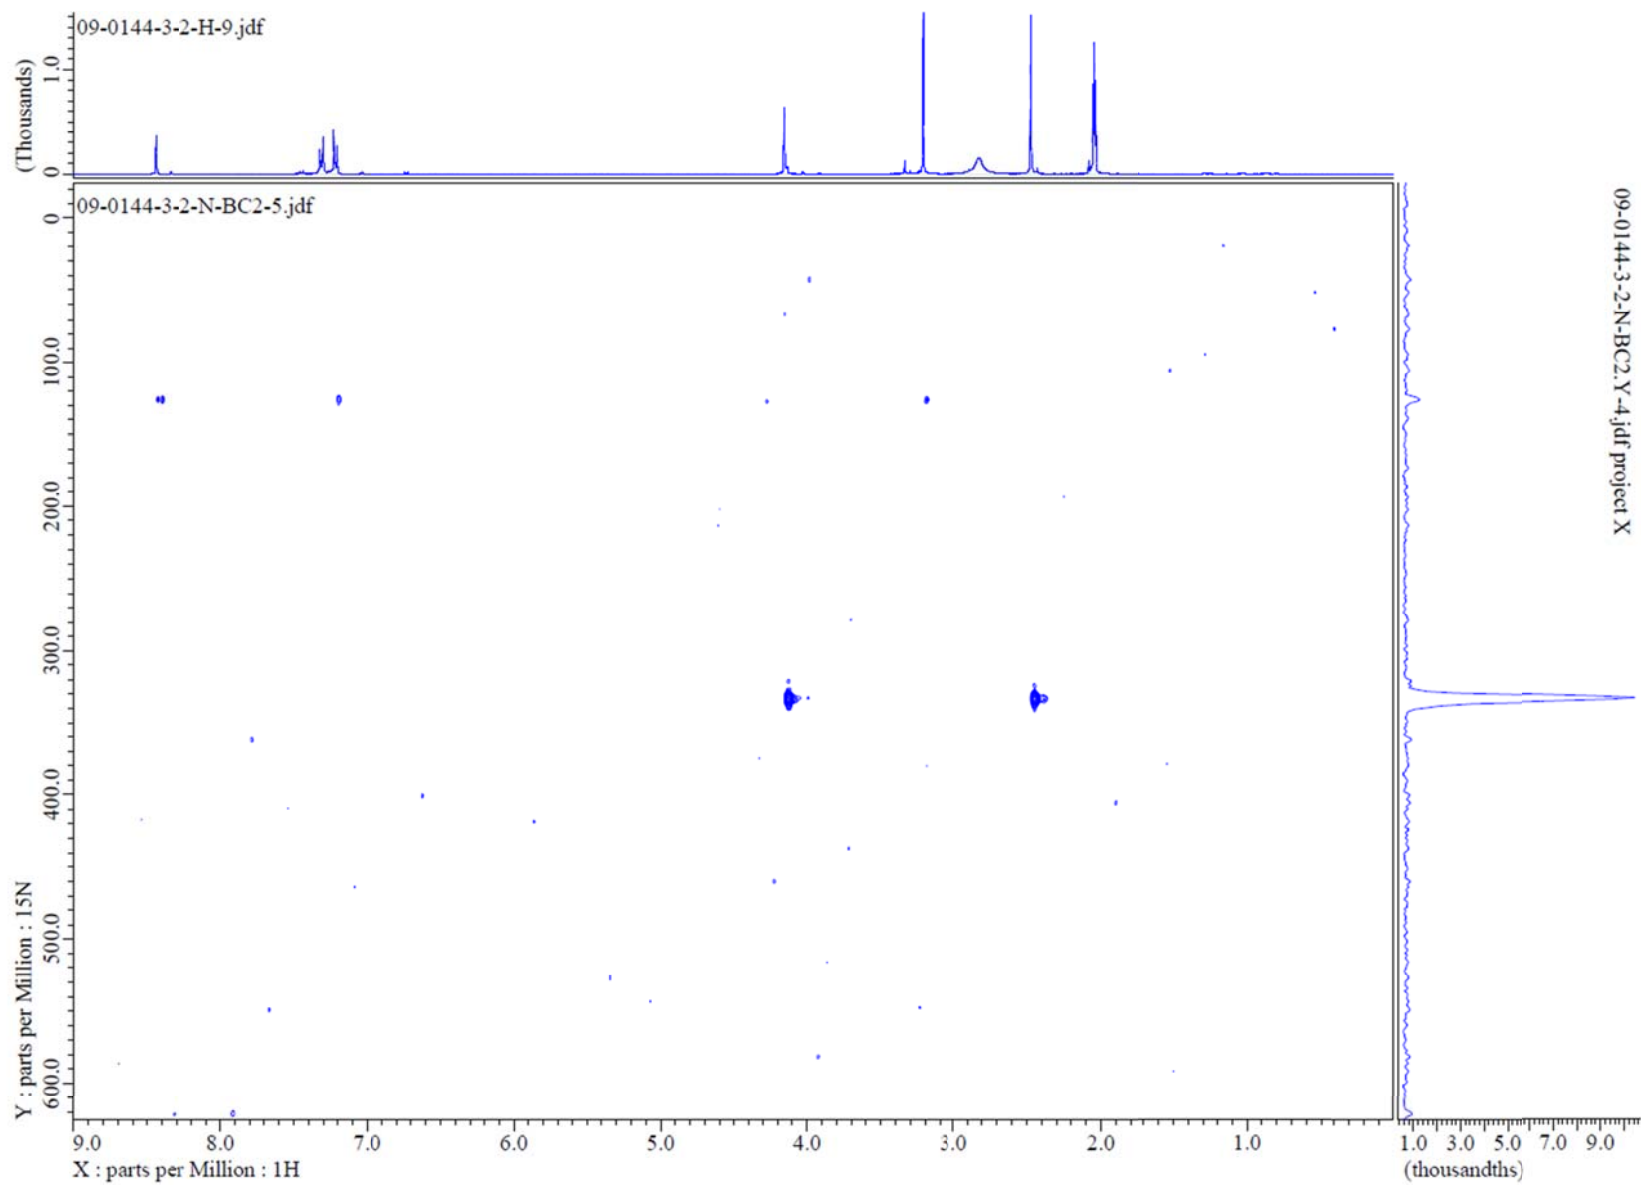

**Figure S6.**  $^{15}\text{NH}$ -HMBC spectrum of compound **1**



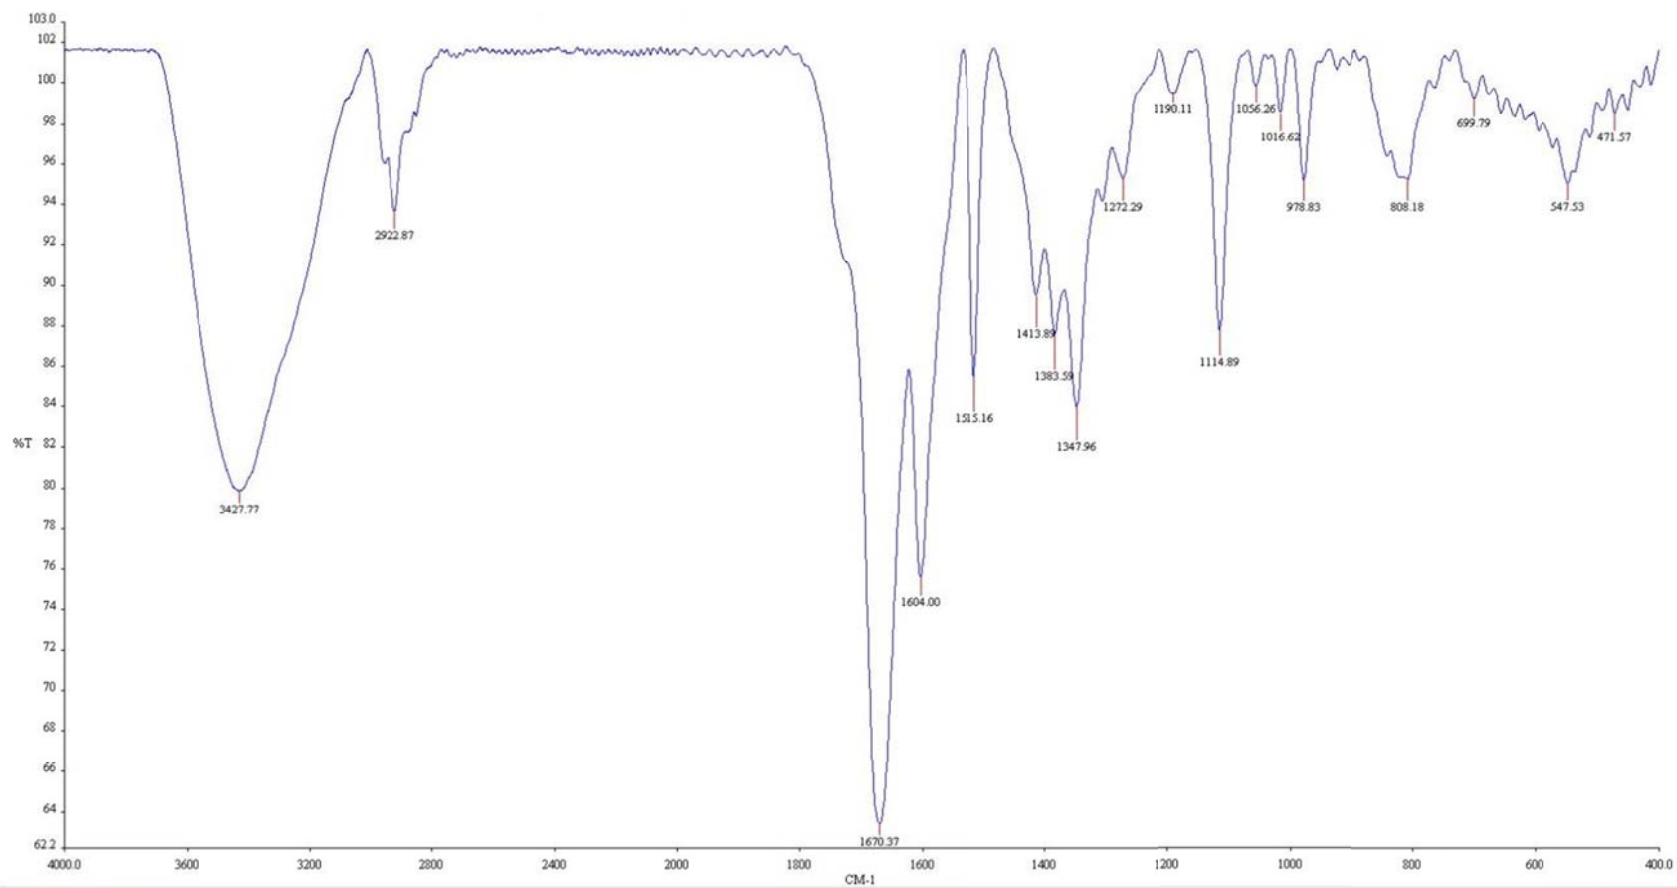

**Figure S7.** IR spectrum of compound **1**
